# Supplementary material for: The impact of age and number of mutations on the size of clonal hematopoiesis
Source: PubMed Central journal article supplement — Proc Natl Acad Sci U S A. 2024 Feb 15;121(8):e2319364121. doi: 10.1073/pnas.2319364121 (PMC10895265; doi:10.1073/pnas.2319364121), 2024-02-15
Supplement: pnas.2319364121.sapp.pdf [file pnas.2319364121.sapp.pdf]

## Supplementary Information for

### The impact of age and number of mutations on the size of clonal hematopoiesis

Kai Wang<sup>a,1</sup>, Wen Zhang<sup>b,1</sup>, Li Yi<sup>a,1</sup>, Ming Zhao<sup>a,e</sup>, Pengyu Li<sup>a</sup>, Meihong Fu<sup>a</sup>, Rong Lin<sup>c,d</sup>, Yongmei Zhu<sup>e</sup>, Jianfeng Li<sup>e</sup>, Weiping Yang<sup>a</sup>, Hai Fang<sup>e</sup>, Zhu Chen<sup>e,\*</sup>, Wangwei Cai<sup>b,\*</sup>, Ruibao Ren<sup>a,e,\*</sup>

<sup>a</sup> International Center for Aging and Cancer, Department of Hematology of The First Affiliated Hospital, Hainan Medical University, Haikou, 571199, China; <sup>b</sup> Department of Biochemistry and Molecular Biology, Key Laboratory of Molecular Biology, School of Basic Medicine and Life Sciences, Hainan Medical University, Haikou, 571199, China; <sup>c</sup> Department of Biology, School of Basic Medicine and Life Sciences, Hainan Medical University, Haikou, 571199, China; <sup>d</sup> Center of Forensic Medicine of Hainan Medical University, Hainan Provincial Academician Workstation (tropical forensic medicine), Hainan Provincial Tropical Forensic Engineering Research Center, Haikou, 571199, China; <sup>e</sup> Shanghai Institute of Hematology, State Key Laboratory for Medical Genomics, National Research Center for Translational Medicine, Ruijin Hospital affiliated to Shanghai Jiao Tong University School of Medicine, Shanghai, 200025, China.

<sup>1</sup> These authors contribute equally to the present work.

\* Correspondence: rbren@sjtu.edu.cn; caiww591020@163.com; zchen@stn.sh.cn

**This PDF file includes:**

The supplemental information text.  
Figure S1  
Tables 1 and 2

**Other supplementary materials for this manuscript include the following:**

Excel file (Supplemental Dataset)

**Fig. S1.**

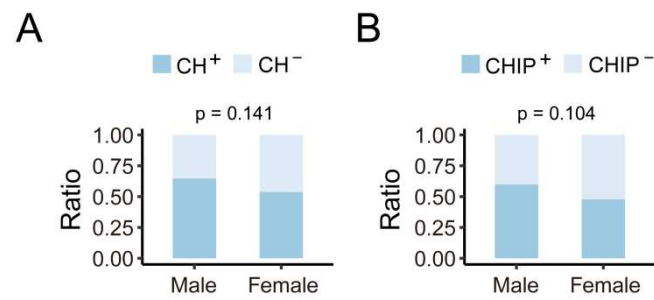

**Figure S1. Comparison of incidence of CH or CHIP between males and females**

A. Stacked bar plot of individuals with CH (CH<sup>+</sup>) and individuals without CH (CH<sup>-</sup>) in the males versus females from both age population. Chi-square test was used for statistical analysis. B. Stacked bar plot of individuals with (CHIP<sup>+</sup>) and individuals without CHIP (CHIP<sup>-</sup>) in the males versus females from both age population. Chi-square test was used for statistical analysis.

**Table S1.**

**Table S1. Genes included in the targeted NGS panel for CH detection**

| Items                   | Gene and locus description                                               |           |         |          |          |          | Number of probes |
|-------------------------|--------------------------------------------------------------------------|-----------|---------|----------|----------|----------|------------------|
| <b>CH related genes</b> | ASXL1***                                                                 | DNMT3A*** | GNAS**  | NF1*     | SETBP1** | STAG2*   | 1150             |
|                         | ATM*                                                                     | ELANE     | GNB1**  | NPM1*    | SETD2**  | STAT3*   |                  |
|                         | BCOR**                                                                   | ETV6*     | HAX1*   | NRAS*    | SETDB1** | TET2***  |                  |
|                         | CALR*                                                                    | EZH2*     | IDH1*   | PIGA*    | SF3B1**  | TP53**#  |                  |
|                         | CBL**                                                                    | FLT3*     | IDH2**  | PPM1D**  | SH2B3**  | U2AF1*   |                  |
|                         | CEBPA*                                                                   | G6PC3*    | JAK2**# | PTPN11*  | SMC1A*   | ZRSR2*   |                  |
|                         | CREBBP**                                                                 | GATA2*    | KRAS*   | RAD21*   | SMC3*    |          |                  |
|                         | CUX1**                                                                   | GFI1*     | MPL*    | RUNX1*   | SRSF2**  |          |                  |
| <b>HLA gene</b>         | HLA-A                                                                    | HLA-B     | HLA-C   | HLA-DRB1 | HLA-DQB1 | HLA-DPB1 | 212              |
| <b>Q&amp;C probes</b>   | 100 rare mutations of Chinese population, germline SNP sites, VAF = 1-3% |           |         |          |          |          | 170              |

\*\*\*SNV/INDEL significantly associated; \*\*SNV/INDEL associated; \*\*#SNV/INDEL/CNV associated; \*SNV/INDEL other related diseases and clonal hematopoiesis updated in progression

NGS: next-generation sequencing ; SNV: single nucleotide variation; INDEL: short insertions and deletions; CNV: copy number variation

**Table S2.****Table S2. List of CH related gene mutations detected with the targeted NGS panel and general information of the studied cohort**

| Sample ID | Sex | Age | Age Intervals | Groups    | Mutated Genes | Mutation Locus | VAF  | Mutation Type |
|-----------|-----|-----|---------------|-----------|---------------|----------------|------|---------------|
| 698       | F   | 97  | 90-99         | Longevous | DNMT3A        | p.Phe640fs     | 3.5  | Frameshift    |
| 698       | F   | 97  | 90-99         | Longevous | DNMT3A        | p.Trp314*      | 5.7  | Nonsense      |
| 698       | F   | 97  | 90-99         | Longevous | TET2          | c.3954+1G>A    | 6.8  | Splicing      |
| 698       | F   | 97  | 90-99         | Longevous | TET2          | p.Asp1376Asn   | 4.2  | Missense      |
| 701       | M   | 97  | 90-99         | Longevous | TP53          | p.Arg156Gly    | 12.7 | Missense      |
| 702       | M   | 99  | 90-99         | Longevous | DNMT3A        | p.Arg882His    | 9.9  | Missense      |
| 702       | M   | 99  | 90-99         | Longevous | TET2          | p.Tyr1569*     | 4.7  | Nonsense      |
| 702       | M   | 99  | 90-99         | Longevous | ASXL1         | p.Gly646fs     | 4.7  | Frameshift    |
| 704       | M   | 99  | 90-99         | Longevous | TET2          | p.Ala1508fs    | 5.9  | Frameshift    |
| 704       | M   | 99  | 90-99         | Longevous | ASXL1         | p.Ser1064fs    | 2.4  | Frameshift    |
| 706       | F   | 95  | 90-99         | Longevous | TET2          | p.Ser1870Leu   | 7.8  | Missense      |
| 709       | M   | 97  | 90-99         | Longevous | DNMT3A        | p.Arg736His    | 2    | Missense      |
| 713       | F   | 99  | 90-99         | Longevous | DNMT3A        | p.Pro700Leu    | 2    | Missense      |
| 715       | F   | 98  | 90-99         | Longevous | TET2          | p.Ile1175Asn   | 2.9  | Missense      |
| 719       | M   | 96  | 90-99         | Longevous | RAD21         | p.Lys26Arg     | 2.3  | Missense      |
| 725       | F   | 110 | 100-110       | Longevous | TET2          | p.Gly1192fs    | 3.5  | Frameshift    |
| 725       | F   | 110 | 100-110       | Longevous | PPM1D         | p.Leu450fs     | 4    | Frameshift    |
| 728       | M   | 101 | 100-110       | Longevous | DNMT3A        | p.Phe731Leu    | 3.7  | Missense      |
| 728       | M   | 101 | 100-110       | Longevous | TET2          | p.Arg544*      | 4.4  | Nonsense      |
| 730       | F   | 101 | 100-110       | Longevous | CBL           | p.Lys382Glu    | 11.5 | Missense      |
| 730       | F   | 101 | 100-110       | Longevous | CBL           | p.Cys416Ser    | 5.5  | Missense      |
| 736       | F   | 96  | 90-99         | Longevous | DNMT3A        | p.Pro849fs     | 35.3 | Frameshift    |
| 736       | F   | 96  | 90-99         | Longevous | TET2          | p.Ser391fs     | 40.5 | Frameshift    |
| 736       | F   | 96  | 90-99         | Longevous | TET2          | p.Pro419fs     | 19.9 | Frameshift    |
| 736       | F   | 96  | 90-99         | Longevous | TET2          | p.Arg1366fs    | 6.6  | Frameshift    |
| 736       | F   | 96  | 90-99         | Longevous | SF3B1         | p.Lys700Glu    | 6.5  | Missense      |
| 738       | F   | 97  | 90-99         | Longevous | TET2          | p.Asn1774fs    | 2.4  | Frameshift    |
| 743       | F   | 107 | 100-110       | Longevous | TET2          | p.Leu615fs     | 1.5  | Frameshift    |
| 745       | M   | 107 | 100-110       | Longevous | TET2          | p.Pro1889Arg   | 4    | Missense      |
| 745       | M   | 107 | 100-110       | Longevous | SF3B1         | p.Lys666Asn    | 4.2  | Missense      |
| 747       | F   | 102 | 100-110       | Longevous | TET2          | p.Leu1340Pro   | 7.8  | Missense      |
| 755       | M   | 95  | 90-99         | Longevous | DNMT3A        | p.Arg635Trp    | 2.9  | Missense      |
| 757       | F   | 107 | 100-110       | Longevous | TET2          | p.Cys353fs     | 1.8  | Frameshift    |
| 762       | F   | 100 | 100-110       | Longevous | SETDB1        | p.Arg620His    | 1.9  | Missense      |
| 764       | F   | 95  | 90-99         | Longevous | STAG2         | p.Asp596His    | 5    | Missense      |
| 767       | M   | 103 | 100-110       | Longevous | DNMT3A        | p.Leu905Pro    | 2.2  | Missense      |
| 767       | M   | 103 | 100-110       | Longevous | DNMT3A        | p.Arg556Ser    | 4.4  | Missense      |
| 767       | M   | 103 | 100-110       | Longevous | RAD21         | p.Tyr617*      | 18.9 | Nonsense      |
| 767       | M   | 103 | 100-110       | Longevous | JAK2          | p.Val617Phe    | 37.7 | Missense      |
| 772       | M   | 98  | 90-99         | Longevous | TET2          | p.Gln644*      | 2    | Nonsense      |
| 772       | M   | 98  | 90-99         | Longevous | ASXL1         | p.Gly646fs     | 12.2 | Frameshift    |
| 774       | M   | 97  | 90-99         | Longevous | DNMT3A        | p.Leu347Arg    | 2.8  | Missense      |

|     |   |     |         |           |        |                   |      |            |
|-----|---|-----|---------|-----------|--------|-------------------|------|------------|
| 776 | F | 96  | 90-99   | Longevous | TET2   | p.Thr1397Ile      | 1.9  | Missense   |
| 783 | M | 99  | 90-99   | Longevous | DNMT3A | p.Arg736Ser       | 21.9 | Missense   |
| 783 | M | 99  | 90-99   | Longevous | TET2   | p.Gln491*         | 10.5 | Nonsense   |
| 787 | F | 110 | 100-110 | Longevous | TET2   | p.Arg1216*        | 5.1  | Nonsense   |
| 787 | F | 110 | 100-110 | Longevous | STAG2  | p.Ile899Asn       | 5.5  | Missense   |
| 789 | M | 100 | 100-110 | Longevous | DNMT3A | p.Arg803Gly       | 6.8  | Missense   |
| 789 | M | 100 | 100-110 | Longevous | DNMT3A | p.Cys494*         | 2.7  | Nonsense   |
| 789 | M | 100 | 100-110 | Longevous | DNMT3A | p.Gln237*         | 4.6  | Nonsense   |
| 796 | M | 97  | 90-99   | Longevous | ASXL1  | p.Leu775fs        | 1.7  | Frameshift |
| 796 | M | 97  | 90-99   | Longevous | PPM1D  | p.Arg581*         | 2.1  | Nonsense   |
| 800 | F | 106 | 100-110 | Longevous | DNMT3A | p.Pro904Leu       | 1.9  | Missense   |
| 800 | F | 106 | 100-110 | Longevous | DNMT3A | p.Asp668Ala       | 2.2  | Missense   |
| 802 | F | 95  | 90-99   | Longevous | TET2   | p.Asn1805fs       | 4.7  | Frameshift |
| 804 | M | 95  | 90-99   | Longevous | DNMT3A | p.Trp409*         | 1.5  | Nonsense   |
| 805 | F | 98  | 90-99   | Longevous | SETD2  | p.Cys805Phe       | 2    | Missense   |
| 806 | M | 96  | 90-99   | Longevous | NRAS   | p.Gly13Cys        | 10.1 | Missense   |
| 812 | F | 98  | 90-99   | Longevous | DNMT3A | p.Pro849fs        | 8.8  | Frameshift |
| 812 | F | 98  | 90-99   | Longevous | DNMT3A | p.Arg771*         | 2.4  | Nonsense   |
| 814 | M | 98  | 90-99   | Longevous | TET2   | p.Pro1194Arg      | 2    | Missense   |
| 820 | F | 96  | 90-99   | Longevous | TET2   | p.Trp1291Gly      | 3.8  | Missense   |
| 820 | F | 96  | 90-99   | Longevous | TET2   | p.Ser271*         | 3.6  | Nonsense   |
| 820 | F | 96  | 90-99   | Longevous | TET2   | p.Lys753Ilefs*16  | 3.1  | Frameshift |
| 820 | F | 96  | 90-99   | Longevous | TET2   | p.Tyr1245Leufs*22 | 2.8  | Frameshift |
| 820 | F | 96  | 90-99   | Longevous | SF3B1  | p.Arg775Gln       | 2.6  | Missense   |
| 820 | F | 96  | 90-99   | Longevous | SETD2  | p.Gly412Asp       | 2.7  | Missense   |
| 822 | M | 99  | 90-99   | Longevous | ASXL1  | p.Arg786Serfs*28  | 9.1  | Frameshift |
| 832 | F | 99  | 90-99   | Longevous | DNMT3A | p.Phe868Ser       | 2.9  | Missense   |
| 832 | F | 99  | 90-99   | Longevous | STAT3  | p.Lys658Arg       | 3.1  | Missense   |
| 824 | F | 104 | 100-110 | Longevous | DNMT3A | c.855+1G>A        | 3.6  | Splicing   |
| 824 | F | 104 | 100-110 | Longevous | TET2   | p.Lys1339*        | 3.6  | Nonsense   |
| 824 | F | 104 | 100-110 | Longevous | TET2   | p.Ile1873Thr      | 2.1  | Missense   |
| 826 | F | 105 | 100-110 | Longevous | DNMT3A | p.Tyr660Asn       | 4.8  | Missense   |
| 826 | F | 105 | 100-110 | Longevous | TET2   | p.Ser1290Thrfs*69 | 2    | Frameshift |
| 828 | F | 97  | 90-99   | Longevous | TET2   | p.Leu1855Trpfs*32 | 34.1 | Frameshift |
| 828 | F | 97  | 90-99   | Longevous | TET2   | p.Asp1427Glufs*21 | 12.1 | Frameshift |
| 828 | F | 97  | 90-99   | Longevous | TET2   | p.Glu1755*        | 2.5  | Nonsense   |
| 830 | F | 102 | 100-110 | Longevous | DNMT3A | p.Arg544Valfs*107 | 1.6  | Frameshift |
| 833 | F | 104 | 100-110 | Longevous | ASXL1  | p.Gln708*         | 2.4  | Nonsense   |
| 836 | F | 108 | 100-110 | Longevous | DNMT3A | p.Arg882Cys       | 5.3  | Missense   |
| 836 | F | 108 | 100-110 | Longevous | TET2   | p.Arg1465*        | 2.4  | Nonsense   |
| 840 | F | 104 | 100-110 | Longevous | DNMT3A | p.Phe521Leufs*18  | 13   | Frameshift |
| 840 | F | 104 | 100-110 | Longevous | TET2   | p.Lys1905Glu      | 10.6 | Missense   |
| 840 | F | 104 | 100-110 | Longevous | CBL    | p.Met400Ilefs*30  | 6.1  | Frameshift |
| 842 | F | 108 | 100-110 | Longevous | DNMT3A | p.Leu295Pro       | 2    | Missense   |
| 842 | F | 108 | 100-110 | Longevous | ASXL1  | p.Asn893*         | 2    | Nonsense   |
| 845 | M | 96  | 90-99   | Longevous | GNAS   | p.Pro308Leu       | 2.9  | Missense   |
| 847 | M | 99  | 90-99   | Longevous | TET2   | p.Cys1193Tyr      | 8.2  | Missense   |
| 847 | M | 99  | 90-99   | Longevous | TET2   | p.Leu1248Pro      | 4.8  | Missense   |
| 847 | M | 99  | 90-99   | Longevous | ASXL1  | p.Trp796Glyfs*22  | 17.7 | Frameshift |
| 847 | M | 99  | 90-99   | Longevous | SH2B3  | p.Ser297*         | 7.1  | Nonsense   |

|     |   |     |         |           |        |                   |      |            |
|-----|---|-----|---------|-----------|--------|-------------------|------|------------|
| 851 | F | 96  | 90-99   | Longevous | DNMT3A | p.Trp581Glyfs*70  | 8.4  | Frameshift |
| 853 | F | 98  | 90-99   | Longevous | TET2   | p.Cys1273Phe      | 1.9  | Missense   |
| 854 | M | 103 | 100-110 | Longevous | CREBBP | p.Arg1173Gln      | 2.8  | Missense   |
| 862 | F | 99  | 90-99   | Longevous | ASXL1  | p.Tyr591*         | 21.8 | Nonsense   |
| 862 | F | 99  | 90-99   | Longevous | GNAS   | p.Arg844His       | 7.4  | Missense   |
| 862 | F | 99  | 90-99   | Longevous | CUX1   | p.Leu112Arg       | 3.6  | Missense   |
| 864 | F | 100 | 100-110 | Longevous | TP53   | p.Val216Met       | 1.8  | Missense   |
| 864 | F | 100 | 100-110 | Longevous | SF3B1  | p.Lys666Asn       | 2.1  | Missense   |
| 867 | F | 95  | 90-99   | Longevous | DNMT3A | p.Ala610Gly       | 2.3  | Missense   |
| 867 | F | 95  | 90-99   | Longevous | DNMT3A | c.2323-2A>T       | 2    | Splicing   |
| 867 | F | 95  | 90-99   | Longevous | DNMT3A | p.Arg899Cys       | 1.7  | Missense   |
| 869 | F | 102 | 100-110 | Longevous | DNMT3A | p.Arg729Gly       | 1.7  | Missense   |
| 872 | F | 101 | 100-110 | Longevous | ASXL1  | p.Gly646Trpfs*12  | 4.1  | Frameshift |
| 874 | F | 99  | 90-99   | Longevous | TET2   | p.Phe776Leufs*5   | 1.6  | Frameshift |
| 874 | F | 99  | 90-99   | Longevous | GNAS   | p.Arg844Cys       | 2.3  | Missense   |
| 876 | F | 95  | 90-99   | Longevous | TET2   | p.Arg1366His      | 11.1 | Missense   |
| 876 | F | 95  | 90-99   | Longevous | NF1    | p.Lys1444Glu      | 2.3  | Missense   |
| 877 | F | 104 | 100-110 | Longevous | TET2   | p.Ile1873Thr      | 4.9  | Missense   |
| 877 | F | 104 | 100-110 | Longevous | STAG2  | p.Leu1247Arg      | 2.3  | Missense   |
| 880 | F | 98  | 90-99   | Longevous | DNMT3A | p.Tyr584*         | 3.5  | Nonsense   |
| 880 | F | 98  | 90-99   | Longevous | TET2   | p.Ala1341Glu      | 2.8  | Missense   |
| 880 | F | 98  | 90-99   | Longevous | TET2   | p.Thr1047Tyrfs*11 | 1.8  | Frameshift |
| 881 | F | 96  | 90-99   | Longevous | TET2   | p.Leu862Alafs*9   | 6.4  | Frameshift |
| 884 | F | 104 | 100-110 | Longevous | TET2   | p.Gln1546*        | 8.9  | Nonsense   |
| 884 | F | 104 | 100-110 | Longevous | TET2   | p.Glu711*         | 2.9  | Nonsense   |
| 884 | F | 104 | 100-110 | Longevous | ASXL1  | p.Glu635Argfs*15  | 10.2 | Frameshift |
| 885 | M | 99  | 90-99   | Longevous | TET2   | p.Glu583*         | 37.9 | Nonsense   |
| 887 | F | 96  | 90-99   | Longevous | TET2   | p.Gln317Argfs*30  | 2.2  | Frameshift |
| 887 | F | 96  | 90-99   | Longevous | TET2   | p.Pro761Leufs*52  | 1.7  | Frameshift |
| 887 | F | 96  | 90-99   | Longevous | TP53   | c.994-1G>A        | 10.8 | Splicing   |
| 890 | F | 99  | 90-99   | Longevous | JAK2   | p.Val617Phe       | 7.2  | Missense   |
| 893 | F | 95  | 90-99   | Longevous | BCOR   | p.Glu867*         | 9    | Nonsense   |
| 896 | F | 103 | 100-110 | Longevous | DNMT3A | p.Ala410Val       | 19.7 | Missense   |
| 896 | F | 103 | 100-110 | Longevous | SH2B3  | p.Arg261Trp       | 2.9  | Missense   |
| 897 | F | 95  | 90-99   | Longevous | TET2   | p.Ile1873Tyr      | 9.4  | Missense   |
| 898 | M | 95  | 90-99   | Longevous | TET2   | p.Gln461*         | 2.1  | Nonsense   |
| 900 | M | 95  | 90-99   | Longevous | TET2   | p.Arg1262Trp      | 4.3  | Missense   |
| 900 | M | 95  | 90-99   | Longevous | CBL    | c.1228-1G>A       | 1.8  | Splicing   |
| 900 | M | 95  | 90-99   | Longevous | SRSF2  | p.Arg184Lys       | 4.1  | Missense   |
| 902 | F | 96  | 90-99   | Longevous | TET2   | p.His1380Tyr      | 29   | Missense   |
| 904 | F | 100 | 100-110 | Longevous | DNMT3A | p.Arg771*         | 1.9  | Nonsense   |
| 904 | F | 100 | 100-110 | Longevous | TET2   | p.Ser420*         | 3.6  | Nonsense   |
| 906 | M | 105 | 100-110 | Longevous | TET2   | p.Cys973Trpfs*3   | 3.9  | Frameshift |
| 906 | M | 105 | 100-110 | Longevous | TET2   | p.Gln706*         | 3.7  | Nonsense   |
| 906 | M | 105 | 100-110 | Longevous | PPM1D  | p.Arg552*         | 4.9  | Nonsense   |
| 906 | M | 105 | 100-110 | Longevous | PPM1D  | p.Cys603*         | 2.1  | Nonsense   |
| 906 | M | 105 | 100-110 | Longevous | IDH2   | p.Arg140Gln       | 2.5  | Missense   |
| 907 | F | 100 | 100-110 | Longevous | DNMT3A | p.Ile705del       | 13.2 | Deletion   |
| 907 | F | 100 | 100-110 | Longevous | DNMT3A | p.Leu411Pro       | 10.4 | Missense   |
| 907 | F | 100 | 100-110 | Longevous | TET2   | p.His1817Thrfs*5  | 7.9  | Frameshift |

|       |   |     |         |           |        |                                 |      |            |
|-------|---|-----|---------|-----------|--------|---------------------------------|------|------------|
| 907   | F | 100 | 100-110 | Longevous | TET2   | p.Val198Lysfs*6                 | 5.3  | Frameshift |
| 907   | F | 100 | 100-110 | Longevous | SF3B1  | p.Lys700Glu                     | 9.9  | Missense   |
| 907   | F | 100 | 100-110 | Longevous | GNAS   | p.Ala537Val                     | 9.3  | Missense   |
| 909   | F | 102 | 100-110 | Longevous | DNMT3A | p.Tyr533Cys                     | 12.7 | Missense   |
| 909   | F | 102 | 100-110 | Longevous | DNMT3A | p.Trp330*                       | 3.9  | Nonsense   |
| 909   | F | 102 | 100-110 | Longevous | TET2   | p.Leu1326_Gln1327de<br>linsPhe* | 4.2  | Deletion   |
| 910   | M | 92  | 90-99   | Longevous | TET2   | p.Phe387fs                      | 3.3  | Frameshift |
| 910   | M | 92  | 90-99   | Longevous | U2AF1  | p.Gln157Pro                     | 3.2  | Missense   |
| 910   | M | 92  | 90-99   | Longevous | RUNX1  | p.Tyr281Cys                     | 5.1  | Missense   |
| 911   | F | 90  | 90-99   | Longevous | DNMT3A | p.Cys818Phe                     | 1.7  | Missense   |
| 911   | F | 90  | 90-99   | Longevous | ASXL1  | p.Ala735Leufs*9                 | 2.1  | Frameshift |
| DZ1   | F | 87  | 80-89   | Common    | DNMT3A | p.Arg749His                     | 24.7 | Missense   |
| DZ1   | F | 87  | 80-89   | Common    | TET2   | p.Asn281fs                      | 23.3 | Frameshift |
| DZ4   | M | 85  | 80-89   | Common    | DNMT3A | p.Cys494*                       | 2    | Nonsense   |
| DZ4   | M | 85  | 80-89   | Common    | DNMT3A | p.Leu347Arg                     | 2    | Missense   |
| DZ4   | M | 85  | 80-89   | Common    | TET2   | p.Gly1370fs                     | 7    | Frameshift |
| DZ10  | M | 81  | 80-89   | Common    | PPM1D  | p.Pro518fs                      | 2.1  | Frameshift |
| DZ14  | M | 80  | 80-89   | Common    | DNMT3A | p.Trp409*                       | 12.7 | Nonsense   |
| DZ25  | M | 65  | 60-69   | Common    | TET2   | p.Arg1201fs                     | 1.7  | Frameshift |
| DZ27  | F | 80  | 80-89   | Common    | DNMT3A | p.Asn430fs                      | 18.8 | Frameshift |
| DZ27  | F | 80  | 80-89   | Common    | TET2   | p.Asn1581fs                     | 19.1 | Frameshift |
| DZ27  | F | 80  | 80-89   | Common    | TET2   | p.Tyr1751fs                     | 5.9  | Frameshift |
| DZ33  | F | 85  | 80-89   | Common    | ASXL1  | p.Tyr974fs                      | 8.1  | Frameshift |
| DZ33  | F | 85  | 80-89   | Common    | U2AF1  | p.Gln157Pro                     | 10.3 | Missense   |
| DZ39  | F | 81  | 80-89   | Common    | SETD2  | p.Lys1020fs                     | 2.2  | Frameshift |
| DZ40  | F | 87  | 80-89   | Common    | TET2   | p.His1881Arg                    | 2    | Missense   |
| DZ42  | F | 89  | 80-89   | Common    | DNMT3A | p.Phe732del                     | 3.6  | Deletion   |
| DZ43  | M | 79  | 70-79   | Common    | TET2   | p.Tyr1579*                      | 1.7  | Nonsense   |
| DZ43  | M | 79  | 70-79   | Common    | ASXL1  | p.Gly629fs                      | 32.8 | Frameshift |
| DZ47  | M | 84  | 80-89   | Common    | DNMT3A | p.Trp297*                       | 3.9  | Nonsense   |
| DZ77  | F | 82  | 80-89   | Common    | DNMT3A | c.1554+1G>A                     | 2.5  | Splicing   |
| DZ77  | F | 82  | 80-89   | Common    | GNB1   | p.Lys57Glu                      | 2.1  | Missense   |
| DZ84  | F | 71  | 70-79   | Common    | DNMT3A | p.Thr645Ala                     | 5    | Missense   |
| DZ90  | M | 71  | 70-79   | Common    | DNMT3A | p.Pro799Ser                     | 3.5  | Missense   |
| DZ90  | M | 71  | 70-79   | Common    | DNMT3A | p.His588fs                      | 8    | Frameshift |
| DZ90  | M | 71  | 70-79   | Common    | RAD21  | p.Asn151fs                      | 1.9  | Frameshift |
| DZ101 | F | 80  | 80-89   | Common    | DNMT3A | p.Phe755Cys                     | 2.2  | Missense   |
| DZ102 | M | 68  | 60-69   | Common    | ASXL1  | p.Gln778*                       | 4.1  | Nonsense   |
| DZ104 | M | 65  | 60-69   | Common    | TET2   | p.Arg1383Ser                    | 2.1  | Missense   |
| DZ105 | M | 78  | 70-79   | Common    | DNMT3A | p.Lys429fs                      | 15.6 | Frameshift |
| DZ105 | M | 78  | 70-79   | Common    | DNMT3A | p.Trp313*                       | 4    | Nonsense   |
| DZ106 | M | 83  | 80-89   | Common    | ASXL1  | p.Glu602*                       | 1.8  | Nonsense   |
| DZ106 | M | 83  | 80-89   | Common    | PPM1D  | p.Lys480*                       | 1.7  | Nonsense   |
| DZ108 | M | 75  | 70-79   | Common    | SETD2  | p.Ile1893Phe                    | 3.2  | Missense   |
| DZ111 | F | 66  | 60-69   | Common    | DNMT3A | p.Gly332Glu                     | 5.9  | Missense   |
| DZ114 | F | 78  | 70-79   | Common    | DNMT3A | p.Ile705Ser                     | 3.7  | Missense   |
| DZ114 | F | 78  | 70-79   | Common    | TET2   | p.Gln323Asnfs*24                | 1.9  | Frameshift |
| DZ115 | F | 65  | 60-69   | Common    | DNMT3A | p.Lys299Asn                     | 2    | Missense   |
| DZ117 | F | 86  | 80-89   | Common    | DNMT3A | p.Pro700Leu                     | 1.8  | Missense   |



|       |   |    |       |        |        |                   |      |            |
|-------|---|----|-------|--------|--------|-------------------|------|------------|
| DZ120 | M | 65 | 60-69 | Common | DNMT3A | p.Leu754His       | 2.3  | Missense   |
| DZ124 | F | 83 | 80-89 | Common | TET2   | p.Cys1464Alafs*6  | 14.1 | Frameshift |
| DZ131 | M | 69 | 60-69 | Common | DNMT3A | p.Met880Val       | 12.5 | Missense   |
| DZ131 | M | 69 | 60-69 | Common | DNMT3A | p.Gln606Leufs*3   | 6.9  | Frameshift |
| DZ131 | M | 69 | 60-69 | Common | ASXL1  | p.Gly646Trpfs*12  | 11.9 | Frameshift |
| DZ136 | F | 83 | 80-89 | Common | DNMT3A | p.Ile470Hisfs*17  | 9.6  | Frameshift |
| DZ136 | F | 83 | 80-89 | Common | TET2   | p.Ser1284Phe      | 4.4  | Missense   |
| DZ137 | F | 76 | 70-79 | Common | DNMT3A | p.Arg635Trp       | 25.7 | Missense   |
| DZ137 | F | 76 | 70-79 | Common | DNMT3A | p.Ala254Profs*60  | 1.8  | Frameshift |
| DZ137 | F | 76 | 70-79 | Common | DNMT3A | p.Leu295Pro       | 2.1  | Missense   |
| DZ137 | F | 76 | 70-79 | Common | TET2   | p.Ile1873Thr      | 2.2  | Missense   |
| DZ144 | M | 80 | 80-89 | Common | DNMT3A | c.855+1G>A        | 4    | Splicing   |
| DZ148 | M | 74 | 70-79 | Common | SF3B1  | p.Lys666Met       | 4.1  | Missense   |
| DZ149 | F | 84 | 80-89 | Common | TET2   | p.Gln273*         | 6.3  | Nonsense   |
| DZ149 | F | 84 | 80-89 | Common | TET2   | p.Gly1861Glufs*26 | 5    | Frameshift |
| DZ149 | F | 84 | 80-89 | Common | SH2B3  | p.Arg392Pro       | 7.4  | Missense   |
| DZ150 | M | 65 | 60-69 | Common | DNMT3A | p.Arg899His       | 3.5  | Missense   |
| DZ153 | F | 68 | 60-69 | Common | GATA2  | p.Pro444Leu       | 1.9  | Missense   |
| DZ155 | M | 65 | 60-69 | Common | DNMT3A | p.Met682Cysfs*23  | 3    | Frameshift |
| DZ155 | M | 65 | 60-69 | Common | DNMT3A | c.1015-1G>C       | 3.3  | Splicing   |
| DZ156 | M | 70 | 70-79 | Common | DNMT3A | p.Trp313*         | 3.2  | Nonsense   |
| DZ156 | M | 70 | 70-79 | Common | TET2   | p.Gln1545*        | 3.7  | Nonsense   |
| DZ156 | M | 70 | 70-79 | Common | ASXL1  | p.Arg1190Thr      | 4    | Missense   |
| DZ158 | F | 65 | 60-69 | Common | SMC3   | p.Gln331Leu       | 36.4 | Missense   |
| DZ162 | M | 72 | 70-79 | Common | STAT3  | p.Thr389Ala       | 1.9  | Missense   |
| DZ164 | F | 75 | 70-79 | Common | TET2   | p.Ser1630*        | 3    | Nonsense   |
| DZ166 | F | 66 | 60-69 | Common | DNMT3A | p.Arg882Ser       | 2    | Missense   |
| DZ173 | F | 83 | 80-89 | Common | DNMT3A | p.Ser312Phe       | 16.9 | Missense   |
| DZ173 | F | 83 | 80-89 | Common | TET2   | p.Arg1516*        | 6.3  | Nonsense   |
| DZ174 | F | 70 | 70-79 | Common | TET2   | p.His1912Glufs*12 | 3    | Frameshift |
| DZ176 | M | 69 | 60-69 | Common | DNMT3A | p.Arg882His       | 5.5  | Missense   |
| DZ178 | F | 68 | 60-69 | Common | DNMT3A | p.Cys514Phe       | 1.9  | Missense   |
| DZ178 | F | 68 | 60-69 | Common | RAD21  | p.Arg586Gln       | 2.1  | Missense   |
| DZ179 | F | 83 | 80-89 | Common | DNMT3A | p.Cys497Ser       | 2.2  | Missense   |
| DZ179 | F | 83 | 80-89 | Common | TET2   | p.Gln1138*        | 1.8  | Nonsense   |
| DZ180 | M | 86 | 80-89 | Common | TET2   | p.GlnQ530*        | 2.7  | Nonsense   |
| DZ183 | F | 85 | 80-89 | Common | TP53   | p.Val216Met       | 2.9  | Missense   |
| DZ188 | M | 65 | 60-69 | Common | DNMT3A | p.Gln534*         | 2.4  | Nonsense   |
| DZ189 | M | 89 | 80-89 | Common | PPM1D  | p.Trp427*         | 2.6  | Nonsense   |
| DZ190 | F | 65 | 60-69 | Common | DNMT3A | p.Tyr533Cys       | 2.7  | Missense   |
| DZ193 | M | 80 | 80-89 | Common | TET2   | p.Arg506*         | 2.6  | Nonsense   |
| DZ194 | M | 80 | 80-89 | Common | NRAS   | p.Tyr157Leufs*19  | 2.4  | Frameshift |
| DZ194 | M | 80 | 80-89 | Common | ZRSR2  | p.Tyr374*         | 1.7  | Nonsense   |
| DZ195 | F | 70 | 70-79 | Common | DNMT3A | p.Arg882Cys       | 5.4  | Missense   |
| DZ195 | F | 70 | 70-79 | Common | DNMT3A | p.Phe414Leufs*7   | 8    | Frameshift |
| DZ197 | M | 65 | 60-69 | Common | CBL    | p.Tyr774*         | 15.5 | Nonsense   |
